# Supplementary material for: T cell responses are elicited against Respiratory Syncytial Virus in the absence of signalling through TLRs, RLRs and IL-1R/IL-18R
Source: PubMed Central journal article supplement (PMC4685246; doi:10.1038/srep18533), 2015-12-21
Supplement: srep18533-s1.pdf [file srep18533-s1.pdf]

SUPPLEMENTAL DATA

T cell responses are elicited against Respiratory Syncytial Virus in the absence of signalling through TLRs, RLRs and IL-1R/IL-18R

Michelle Goritzka<sup>1</sup>, Catherine Pereira<sup>1</sup>, Spyridon Makris<sup>1</sup>, Lydia R. Durant<sup>1</sup>  
and Cecilia Johansson\*<sup>1</sup>

**Figure S1. Flow cytometry gating strategy for T cells during RSV infection.** A) Representative plots of non-debris (SSC-A vs FSC-A), singlet (FSC-W vs FSC-A and SSC-W vs SSC-A), live (Dead cells vs SSC-A) lung cells analyzed for expression of CD3 and CD19. CD3<sup>+</sup> cells were further gated on CD4 and CD8 expression. B) Representative plots of expression of M Tetramer and CD8 on CD3<sup>+</sup> CD19<sup>-</sup> lung cells from wt and MTM<sup>-/-</sup> mice examined on day 0 (PBS) and day 8 post RSV infection.

**A**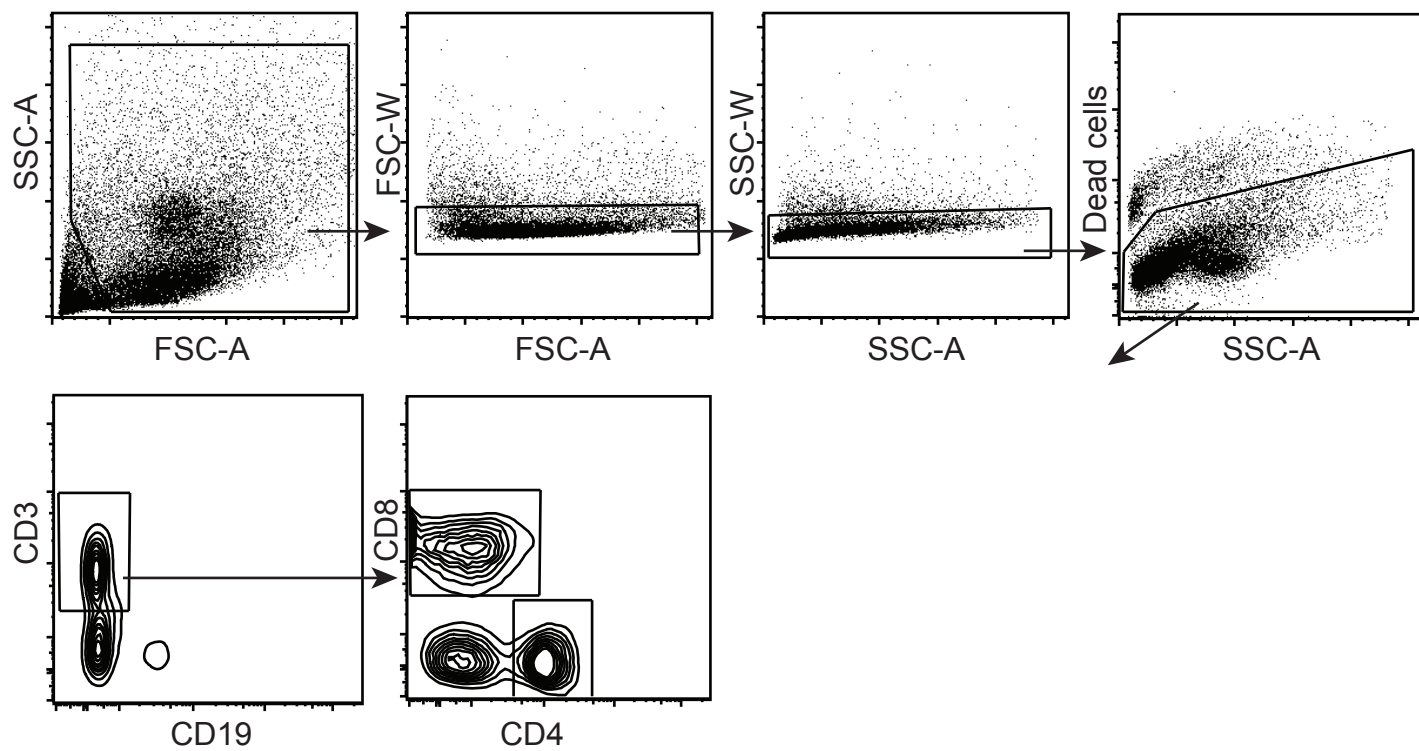**B**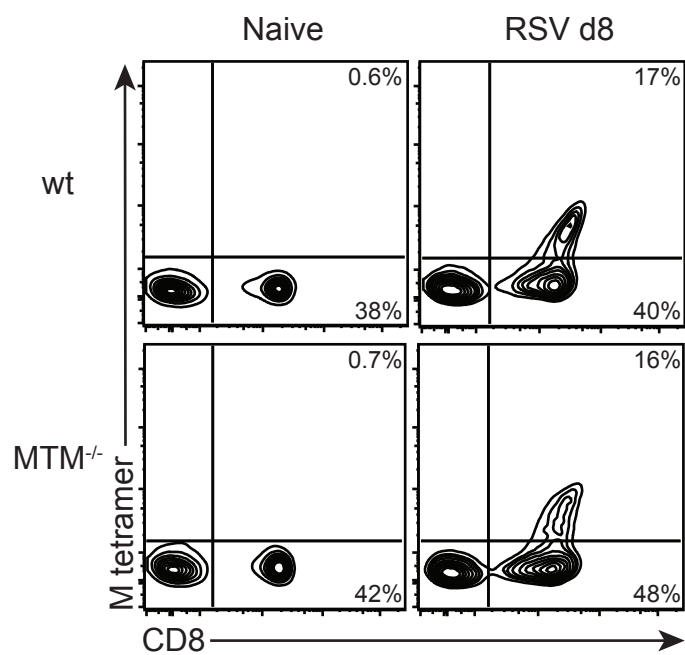

Figure S1. Goritzka et al
